# Supplementary material for: Switchable third ScFeO3 polar ferromagnet with YMnO3-type structure
Source: Royal Society of Chemistry journal article supplement (doi:10.1039/c9tc07006k), 2020-01-01
Supplement: c9tc07006k1.pdf [file c9tc07006k1.pdf]

# Supplementary Materials for Switchable third $\text{ScFeO}_3$ polar ferromagnet with $\text{YMnO}_3$ - type structure

Yosuke Hamasaki<sup>1</sup>, Tsukasa Katayama<sup>2</sup>, Shintaro Yasui<sup>3</sup>, Takahisa Shiraishi<sup>4</sup>, Akihiro Akama<sup>4</sup>, Takanori Kiguchi<sup>4</sup>, Tomoyasu Taniyama<sup>3</sup>, and Mitsuru Itoh<sup>3</sup>

<sup>1</sup>Department of Applied Physics, National Defense Academy, Yokosuka 239-8686, Japan

<sup>2</sup>Department of Chemistry, The University of Tokyo, Bunkyo-ku, Tokyo 112-0033, Japan

<sup>3</sup>Laboratory for Materials and Structures, Tokyo Institute of Technology, 4259-J2-19, Nagatsuta-cho, Midori-ku, Yokohama 226-8503, Japan

<sup>4</sup>Institute for Materials Research, Tohoku University, 2-1-1 Katahira, Aoba-ku, Sendai 980-8577, Japan

## **The PDF file includes**

Materials and Methods

Figures S1 to S8

## **Materials and Methods**

### Materials

ScFeO<sub>3</sub> films were deposited by pulsed laser deposition (PLD) technique with the fourth-harmonic wave of a Nd:YAG laser ( $\lambda = 266$  nm). La<sub>1-x</sub>Sr<sub>x</sub>MnO<sub>3</sub> (xLSMO) ( $x = 0.2$  and  $0.3$ ) films were grown on SrTiO<sub>3</sub>(STO)(111) substrate at 700°C under O<sub>2</sub> pressure of 20 mTorr. ScFeO<sub>3</sub> films were deposited at 700°C under O<sub>2</sub> pressure of 20 mTorr. Thickness of xLSMO films were ~100 nm, and that of ScFeO<sub>3</sub> film was ~50 nm. The repetition rate and fluence of the laser were 5 Hz and 0.96 Jcm<sup>-2</sup>, respectively. A ScFeO<sub>3</sub> target was prepared using  $\alpha$ -Fe<sub>2</sub>O<sub>3</sub> and Sc<sub>2</sub>O<sub>3</sub> powders, and sintering at 1350 °C for 6 hours in air. xLSMO targets were prepared using La<sub>2</sub>O<sub>3</sub>, SrCO<sub>3</sub> and MnO<sub>2</sub> powders. The mixtures were sintered at 1450°C for 12h under O<sub>2</sub> flow.

### Methods

#### Structural characterization

The crystal structures of the films were characterized by high-resolution X-ray diffraction (HRXRD) using a Rigaku Smart-Lab diffractometer, where X-ray was monochromatized using a Ge(220) 2-bounce crystal and Cu K $\alpha$  radiation ( $\lambda = 1.5406$  Å). Reciprocal space mapping (RSM) was performed to determine the lattice constants. The film structure was characterized by high-angle annular dark-field scanning transmission electron microscopy (HAADF-STEM) and energy dispersive X-ray (EDX) observations using a JEOL JEM-ARM200F.

#### Ferroelectric and magnetic characterization

In order to evaluate the ferroelectric properties, we fabricated a capacitor structure. Pt with  $\phi 100$   $\mu\text{m}$  and 0.2LSMO film, used for top and bottom electrodes, respectively, were deposited on SrTiO<sub>3</sub>(111) substrates. Polarization vs. electric field ( $P$ - $E$ ) hysteresis loops were collected using a ferroelectric tester (Radiant, Precision Multiferroic II and Toyo Corporation, FCE). Field-cooled (FC)

dc magnetizations and magnetization hysteresis curves were measured using a Quantum Design Magnetic Property Measurement System (MPMS). FC magnetizations were recorded at 1000 Oe in the temperature range 5-300 K. X-ray absorption spectroscopy (XAS) and X-ray magnetic circular dichroism (XMCD) spectra were measured at 35 K at a field of 1 kOe with polarized light switching mode after application of 50 kOe using BL16A in KEK-PF.

#### Detail of Deposition of YMnO<sub>3</sub>-type ScFeO<sub>3</sub> on electrode film

In our previous work, single phase hexagonal ScFeO<sub>3</sub> films were obtained on MgAl<sub>2</sub>O<sub>4</sub>(001) and Al<sub>2</sub>O<sub>3</sub>(0001) substrates.<sup>1</sup> Based on the results, we selected candidates for bottom electrodes to stabilize YMnO<sub>3</sub>-type ScFeO<sub>3</sub>. First, we focused on a MgAl<sub>2</sub>O<sub>4</sub>(001) substrate. MgAl<sub>2</sub>O<sub>4</sub> have a spinel-type structure, and their in-plane symmetry is square. Conductive materials with spinel related structure are Fe<sub>3</sub>O<sub>4</sub>, LiTi<sub>2</sub>O<sub>4</sub> and TiN, however these compounds are not suitable for a growth condition in an oxygen atmosphere. Then, we selected La doped BaSnO<sub>3</sub> with a perovskite structure. Lattice constants of BaSnO<sub>3</sub> is  $a = 4.1085 \text{ \AA}$  which is close that of MgAl<sub>2</sub>O<sub>4</sub> ( $a = 4.042 \text{ \AA}$ ). We attempted to grow ScFeO<sub>3</sub> films on La doped BaSnO<sub>3</sub> epitaxial films deposited on SrTiO<sub>3</sub>(001) substrates. Bixbyite-type ScFeO<sub>3</sub> was mainly grown, while YMnO<sub>3</sub>-type ScFeO<sub>3</sub> was also grown as a secondary phase on BaSnO<sub>3</sub> film. Although we also attempted to deposit ScFeO<sub>3</sub> on the La doped SrSnO<sub>3</sub> film, the single phase of YMnO<sub>3</sub>-type ScFeO<sub>3</sub> has not been obtained. Second, we focused on an Al<sub>2</sub>O<sub>3</sub>(0001) substrate, whose structure is corundum-type with a hexagonal in-plane symmetry. Although we previously deposited ScFeO<sub>3</sub> film on films and substrates with hexagonal in-plane symmetry such as ZnO(0001), ITO(111) and Pt(111), YMnO<sub>3</sub>-type ScFeO<sub>3</sub> could not be grown as a main phase. In the view point of lattice constants, in-plane lattice constant of SrTiO<sub>3</sub>(111) is close that of Al<sub>2</sub>O<sub>3</sub>(0001). We attempted to grow ScFeO<sub>3</sub> film on conductive perovskite films (SrRuO<sub>3</sub>, 0.3LSMO, and 0.2LSMO) on SrTiO<sub>3</sub>(111) substrate. As a result, we succeeded in

obtaining the YMnO<sub>3</sub>-type ScFeO<sub>3</sub> film on the 0.2LSMO film on the SrTiO<sub>3</sub>(111) substrate.

Unit cell volume of  $h$ -Lu<sub>1-x</sub>Sc<sub>x</sub>FeO<sub>3</sub>

The unit cell volume of  $h$ -Lu<sub>1-x</sub>Sc<sub>x</sub>FeO<sub>3</sub><sup>2</sup> and  $h$ -ScFeO<sub>3</sub> film (this work) was plotted in figure S1.

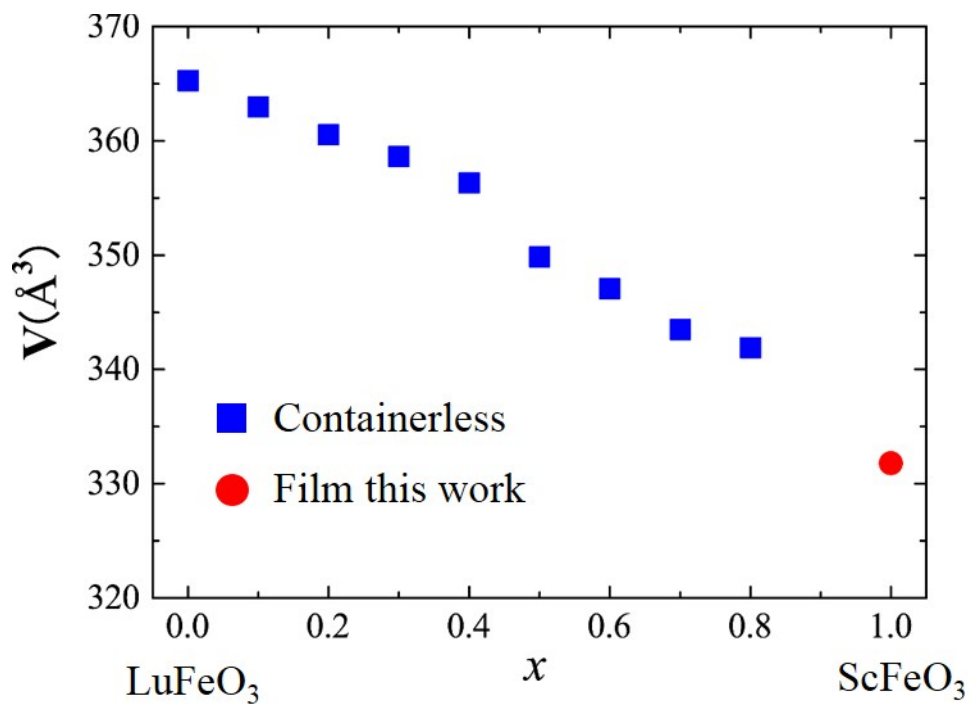

**Figure S1.** The unit cell volume of  $h$ -Lu<sub>1-x</sub>Sc<sub>x</sub>FeO<sub>3</sub>. Blue squares and red circle correspond to cell volumes reported in ref. 2 and this work, respectively.

$\phi$ -scan of  $h$ - $\text{Lu}_{1-x}\text{Sc}_x\text{FeO}_3$

Figure S2 shows the  $\phi$ -scan pattern recorded around the  $\text{ScFeO}_3\{304\}$ ,  $0.2\text{LSMO}\{110\}_{\text{pc}}$ , and  $\text{STO}\{110\}$  reflections. The  $\phi$ -scans of the  $0.2\text{LSMO}\{110\}_{\text{pc}}$  and  $\text{STO}\{110\}$  reflections showed three peaks reflecting the in-plane three-fold symmetry. The peaks of  $\text{ScFeO}_3\{304\}$  showed six-fold symmetry characterized by a hexagonal unit cell.

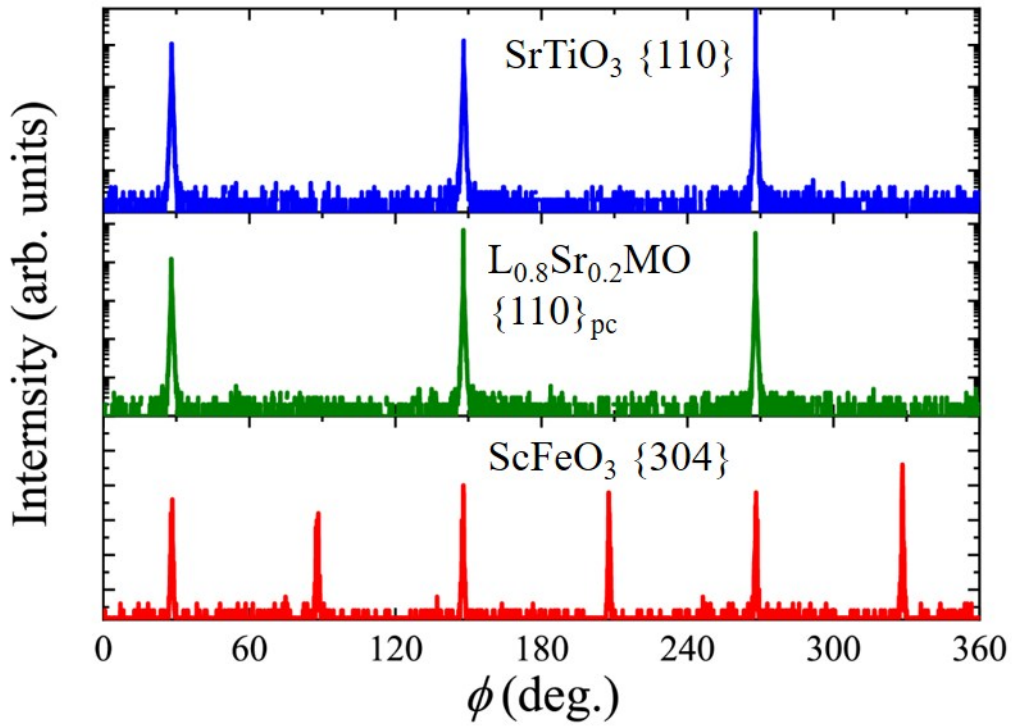

**Figure S2.**  $\phi$ -scan patterns of  $\text{STO}\{110\}$ ,  $0.2\text{LSMO}\{110\}_{\text{pc}}$ , and  $h$ - $\text{ScFeO}_3\{304\}$ .

Crystal structure of corundum

Figure S3 shows a  $P$ - $E$  hysteresis loop (red line) and  $I$ - $E$  curve (black line) measured at 100 kHz and room temperature.

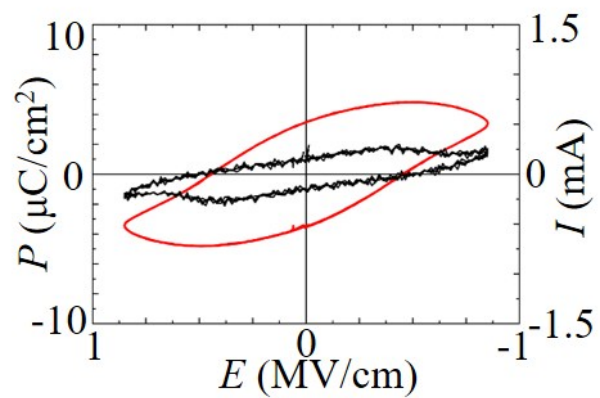

**Figure S3.**  $P$ - $E$  hysteresis loop (red line) and  $I$ - $E$  curve (black line) measured at 100 kHz and room temperature

### Ferroelectric domain structure of *h*-ScFeO<sub>3</sub> film

The ferroelectric domain structure of the *h*-ScFeO<sub>3</sub> film was investigated by HAADF-STEM.

Figure S4 shows the HAADF-STEM image around the ferroelectric 180° domain boundary in the ScFeO<sub>3</sub> film.

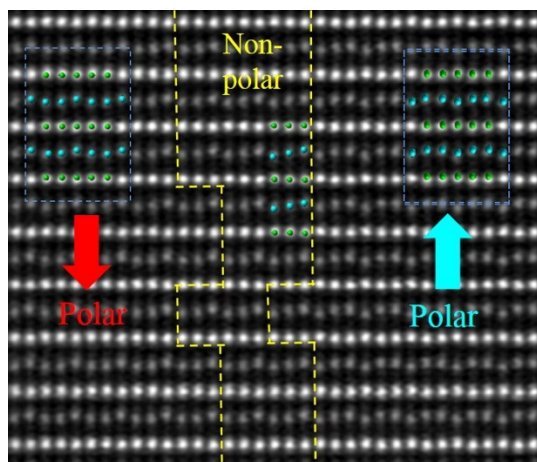

**Figure S4.** HAADF-STEM image around the ferroelectric 180° domain boundary in the ScFeO<sub>3</sub> film.

### Characterization of the InFeO<sub>3</sub> film by XRD measurements

In order to distinguish between the polar ( $P6_3cm$ ) and nonpolar ( $P6_3/mmc$ ) structures, we performed HR XRD  $2\theta$ - $\omega$  scan along the InFeO<sub>3</sub> [-126] direction ( $P6_3/mmc$  notation), as shown in Figure S5. Figure S6 and S7 show HR XRD  $2\theta$ - $\omega$  patterns of  $h$ -InFeO<sub>3</sub>  $-1/3\ 2/3\ 4$  and  $-2/3\ 4/3\ 8$  reflections, respectively. Both peaks were not observed, indicating that the InFeO<sub>3</sub> film is a nonpolar  $P6_3/mmc$ .

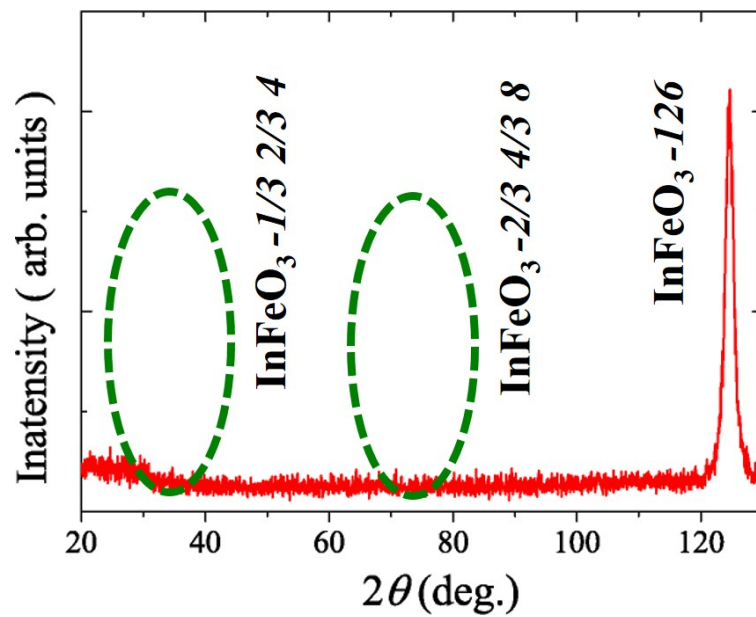

**Figure S5** HR-XRD  $2\theta$ - $\omega$  pattern of the  $h$ -InFeO<sub>3</sub> film along  $h$ -InFeO<sub>3</sub> [-126] direction.



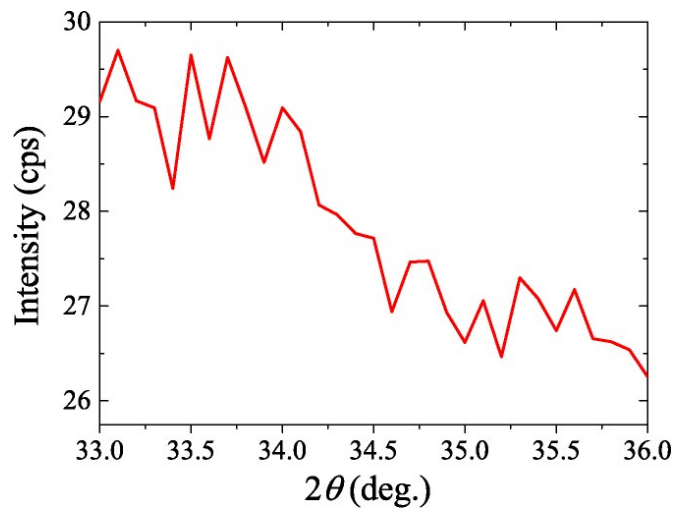

**Figure S6.** HR-XRD  $2\theta$ - $\omega$  pattern of the  $h$ -InFeO<sub>3</sub> film around  $h$ -InFeO<sub>3</sub> -1/3 2/3 4 reflection.

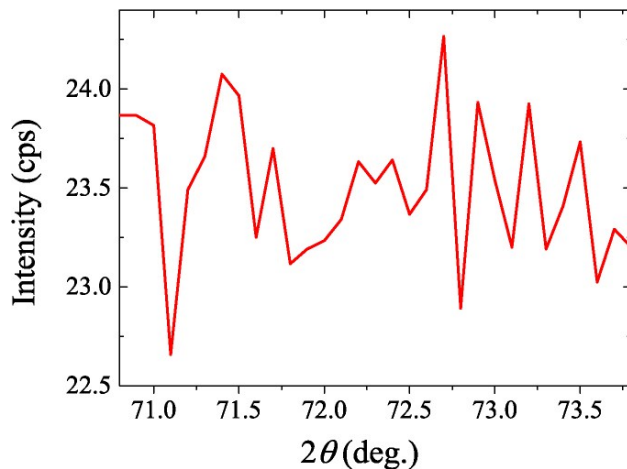

**Figure S7.** HR-XRD  $2\theta$ - $\omega$  pattern of the  $h$ -InFeO<sub>3</sub> film around  $h$ -InFeO<sub>3</sub> -2/3 4/3 8 reflection.

#### $T_N$ vs lattice constant $c$

Figure S8 shows  $T_N$  versus lattice constants  $c$  of  $h$ -ReFeO<sub>3</sub> and  $h$ -ReMnO<sub>3</sub>, respectively.<sup>2-7</sup> Although the magnetic interaction along the  $c$ -axis is smaller than that along the  $a$ -axis,<sup>8</sup>  $T_N$  also decreases with the decrease in  $c$ . Compared with ReMnO<sub>3</sub>, ReFeO<sub>3</sub> has a large  $c$ -axis length. This is because the occupancy of the  $d_{z^2}$  orbital in ReFeO<sub>3</sub> yields a larger  $c$  lattice constant than does ReMnO<sub>3</sub>, in which the  $d_{z^2}$  orbital of Mn<sup>3+</sup> is empty because of the repulsion between the electron and oxygen-anion ligands.

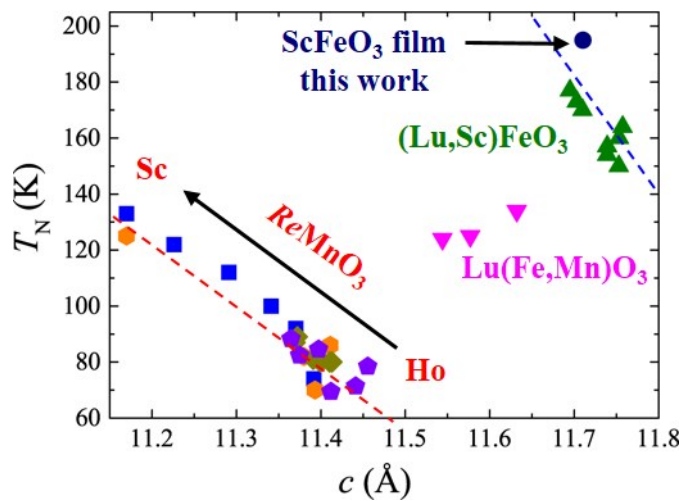

Figure S8  $T_N$  vs. the lattice constant  $c$  of hexagonal  $ReFeO_3$  and  $ReMnO_3$ . Green triangles, pink inverted triangles, other rhombus, orange hexagons, purple pentagons, and blue squares plot the results of Refs. 2, 3, 4, 5, 6, and 7. The navy blue circle corresponds to the  $ScFeO_3$  film of this study. Dotted lines and solid lines are provided as guides.

## REFERENCES

- 1 Y. Hamasaki, T. Shimizu, S. Yasui, T. Taniyama, O. Sakata and M. Itoh, *Cryst. Growth Des.*, 2016, **16**, 5214–5222.
- 2 A. Masuno, A. Ishimoto, C. Moriyoshi, H. Kawaji, Y. Kuroiwa and H. Inoue, *Inorg. Chem.*, 2015, **54**, 9432–9437.
- 3 S. M. Disseler, X. Luo, B. Gao, Y. S. Oh, R. Hu, Y. Wang, D. Quintana, A. Zhang, Q. Huang, J. Lau, R. Paul, J. W. Lynn, S.-W. Cheong and W. Ratcliff, *Phys. Rev. B*, 2015, **92**, 054435.
- 4 K. Uusi-Esko, J. Malm, N. Imamura, H. Yamauchi and M. Karppinen, *Mater. Chem. Phys.*, 2008, **112**, 1029–1034.
- 5 T. Katsufuji, S. Mori, M. Masaki, Y. Moritomo, N. Yamamoto and H. Takagi, *Phys. Rev. B*, 2001, **64**, 104419.
- 6 J. S. Zhou, J. B. Goodenough, J. M. Gallardo-Amores, E. Morán, M. A. Alario-Franco and R. Caudillo, *Phys. Rev. B - Condens. Matter Mater. Phys.*, 2006, **74**, 014422.
- 7 C. T. Wu, B. N. Lin and H. C. Ku, 2003, **41**, 652–661.
- 8 C. Xu, Y. Yang, S. Wang, W. Duan, B. Gu and L. Bellaiche, *Phys. Rev. B*, 2014, **89**, 205122.
